# Supplementary material for: Natural History of Pediatric Low-Grade Glioma Disease - First Multi-State Model Analysis
Source: PubMed Central journal article supplement (PMC6856735; doi:10.7150/jca.33463), 2019-10-17
Supplement: jcav10p6314s1.pdf [file jcav10p6314s1.pdf]

# Natural History of Pediatric Low-Grade Glioma Disease – First Multi-State Model Analysis

## SUPPLEMENTALS

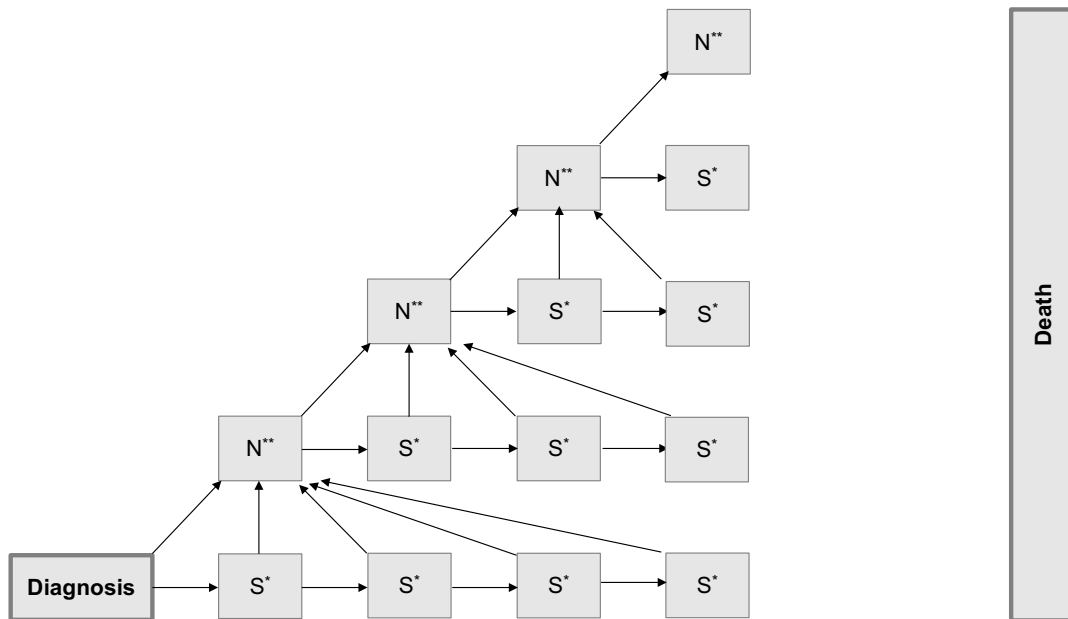

**Supplemental figure S1: Schematic multi-state model for PLGG.** Schematic model of possible states (boxes) and transitions (arrows) for disease development of PLGG. Starting state was defined as “diagnosis”, transient states as surgical intervention ( $S^*$ ) or non-surgical intervention ( $N^{**}$ ), i.e. chemotherapy or radiotherapy. Absorbing state “death” can be reached from all other states. For reasons of better clarity, arrows into the absorbing state have been omitted.

|                       | <b>State 1</b><br>[no intervention] | <b>State 2</b><br>[1 <sup>st</sup> surgery] | <b>State 3</b><br>[≥2 <sup>nd</sup> surgery] | <b>State 4</b><br>[1 <sup>st</sup> ChT/RT] | <b>State 5</b><br>[surgery after<br>1 <sup>st</sup> ChT/RT] | <b>State 6</b><br>[≥2 <sup>nd</sup> ChT/RT] | <b>State 7</b><br>[Death] |
|-----------------------|-------------------------------------|---------------------------------------------|----------------------------------------------|--------------------------------------------|-------------------------------------------------------------|---------------------------------------------|---------------------------|
| Time point<br>[years] | Probability (SE)                    | Probability (SE)                            | Probability (SE)                             | Probability (SE)                           | Probability (SE)                                            | Probability (SE)                            | Probability (SE)          |
| 1                     | 0.17 (0.009)                        | 0.58 (0.012)                                | 0.06 (0.006)                                 | 0.16 (0.009)                               | 0.01 (0.002)                                                | 0.01 (0.003)                                | 0.00 (0.002)              |
| 2                     | 0.15 (0.009)                        | 0.54 (0.013)                                | 0.09 (0.007)                                 | 0.18 (0.010)                               | 0.01 (0.002)                                                | 0.02 (0.004)                                | 0.01 (0.003)              |
| 3                     | 0.13 (0.008)                        | 0.52 (0.013)                                | 0.10 (0.008)                                 | 0.19 (0.010)                               | 0.01 (0.002)                                                | 0.04 (0.005)                                | 0.02 (0.004)              |
| 4                     | 0.11 (0.008)                        | 0.50 (0.013)                                | 0.10 (0.008)                                 | 0.19 (0.010)                               | 0.02 (0.003)                                                | 0.05 (0.005)                                | 0.02 (0.004)              |
| 5                     | 0.11 (0.008)                        | 0.49 (0.013)                                | 0.11 (0.008)                                 | 0.19 (0.010)                               | 0.02 (0.004)                                                | 0.06 (0.006)                                | 0.02 (0.004)              |
| 6                     | 0.10 (0.008)                        | 0.48 (0.013)                                | 0.11 (0.008)                                 | 0.20 (0.011)                               | 0.02 (0.004)                                                | 0.07 (0.007)                                | 0.03 (0.004)              |
| 7                     | 0.10 (0.008)                        | 0.46 (0.013)                                | 0.11 (0.009)                                 | 0.20 (0.011)                               | 0.02 (0.004)                                                | 0.07 (0.007)                                | 0.03 (0.005)              |
| 8                     | 0.10 (0.008)                        | 0.46 (0.014)                                | 0.11 (0.009)                                 | 0.20 (0.012)                               | 0.02 (0.004)                                                | 0.08 (0.008)                                | 0.03 (0.005)              |
| 9                     | 0.09 (0.009)                        | 0.45 (0.016)                                | 0.11 (0.011)                                 | 0.20 (0.013)                               | 0.02 (0.005)                                                | 0.08 (0.008)                                | 0.05 (0.008)              |
| 10                    | 0.09 (0.009)                        | 0.43 (0.019)                                | 0.11 (0.014)                                 | 0.21 (0.017)                               | 0.02 (0.005)                                                | 0.09 (0.009)                                | 0.05 (0.009)              |

**Supplemental table S2: State-probabilities and corresponding Aalen standard error [SE] for whole group of patients with PLGG at time points 1 to 10 years after diagnosis.** State-probabilities and corresponding Aalen SE for the whole group of patients with PLGG (n=1587) at time point 1 to 10 years after diagnosis. State 1: no intervention. State 2: first surgery without prior adjuvant therapy. State 3: two or more surgeries without prior adjuvant therapy. State 4: first adjuvant therapy. State 5: one or more surgeries after first adjuvant therapy. State 6: two or more adjuvant therapies. State 7: death of any cause. Levels of progressiveness: non-progressive (states 1 and 2), low progressive (states 3 and 4), and highly progressive (states 5 and 6) PLGG. ChT: chemotherapy. RT: radiotherapy.

| Subgroups of patients with PLGG                      | State 1           | State 2                   | State 3                    | State 4                  | State 5                                | State 6                   | State 7          |
|------------------------------------------------------|-------------------|---------------------------|----------------------------|--------------------------|----------------------------------------|---------------------------|------------------|
|                                                      | [no intervention] | [1 <sup>st</sup> surgery] | [≥2 <sup>nd</sup> surgery] | [1 <sup>st</sup> ChT/RT] | [surgery after 1 <sup>st</sup> ChT/RT] | [≥2 <sup>nd</sup> ChT/RT] | [Death]          |
|                                                      | Probability (SE)  | Probability (SE)          | Probability (SE)           | Probability (SE)         | Probability (SE)                       | Probability (SE)          | Probability (SE) |
| <b>Age-group [years]</b>                             |                   |                           |                            |                          |                                        |                           |                  |
| <1                                                   | 0.16 (0.041)      | 0.19 (0.044)              | 0.11 (0.034)               | 0.16 (0.041)             | 0.03 (0.017)                           | 0.27 (0.049)              | 0.09 (0.032)     |
| 1-7 <sup>11/12</sup>                                 | 0.13 (0.012)      | 0.41 (0.018)              | 0.10 (0.011)               | 0.25 (0.016)             | 0.02 (0.005)                           | 0.07 (0.010)              | 0.02 (0.005)     |
| ≥ 8                                                  | 0.09 (0.010)      | 0.60 (0.018)              | 0.11 (0.012)               | 0.14 (0.013)             | 0.02 (0.005)                           | 0.03 (0.006)              | 0.02 (0.005)     |
| <b>Sex</b>                                           |                   |                           |                            |                          |                                        |                           |                  |
| Female                                               | 0.11 (0.012)      | 0.46 (0.019)              | 0.12 (0.012)               | 0.20 (0.015)             | 0.02 (0.005)                           | 0.06 (0.009)              | 0.02 (0.006)     |
| Male                                                 | 0.11 (0.011)      | 0.51 (0.018)              | 0.09 (0.010)               | 0.18 (0.014)             | 0.02 (0.005)                           | 0.06 (0.008)              | 0.02 (0.005)     |
| <b>Main location</b>                                 |                   |                           |                            |                          |                                        |                           |                  |
| Cerebral hemispheres                                 | 0.05 (0.013)      | 0.72 (0.027)              | 0.15 (0.021)               | 0.05 (0.013)             | 0.01 (0.006)                           | 0.01 (0.005)              | 0.01 (0.006)     |
| Supratentorial midline                               | 0.22 (0.017)      | 0.18 (0.016)              | 0.04 (0.008)               | 0.35 (0.020)             | 0.04 (0.009)                           | 0.13 (0.014)              | 0.04 (0.008)     |
| Cerebellum                                           | 0.02 (0.006)      | 0.74 (0.021)              | 0.18 (0.019)               | 0.05 (0.011)             | 0.00 (0.002)                           | 0.00 (0.003)              | 0.00 (0.002)     |
| Caudal brain stem                                    | 0.10 (0.027)      | 0.36 (0.045)              | 0.05 (0.020)               | 0.33 (0.045)             | 0.00 (0.000)                           | 0.12 (0.030)              | 0.05 (0.020)     |
| Spinal cord                                          | 0.04 (0.022)      | 0.44 (0.065)              | 0.15 (0.048)               | 0.28 (0.059)             | 0.00 (0.000)                           | 0.02 (0.019)              | 0.07 (0.034)     |
| Lateral ventricles                                   | 0.15 (0.052)      | 0.74 (0.067)              | 0.10 (0.049)               | 0.00 (0.000)             | 0.00 (0.000)                           | 0.00 (0.000)              | 0.00 (0.000)     |
| <b>Main histology</b>                                |                   |                           |                            |                          |                                        |                           |                  |
| Pilocytic astrocytoma I°                             | 0.00 (0.002)      | 0.59 (0.017)              | 0.14 (0.012)               | 0.17 (0.013)             | 0.03 (0.006)                           | 0.06 (0.008)              | 0.02 (0.004)     |
| Diffuse astrocytoma II°                              | 0.01 (0.006)      | 0.45 (0.043)              | 0.14 (0.031)               | 0.19 (0.035)             | 0.01 (0.006)                           | 0.11 (0.026)              | 0.10 (0.025)     |
| Neuronal and mixed neuronal-glial tumors             | 0.00 (0.000)      | 0.75 (0.031)              | 0.12 (0.024)               | 0.07 (0.019)             | 0.02 (0.010)                           | 0.02 (0.010)              | 0.01 (0.007)     |
| Low-grade neuroepithelial or glial lesions [LGG-NOS] | 0.00 (0.000)      | 0.69 (0.058)              | 0.02 (0.014)               | 0.14 (0.043)             | 0.04 (0.022)                           | 0.06 (0.028)              | 0.06 (0.030)     |
| <b>Neurofibromatosis type 1 [NF-1]</b>               |                   |                           |                            |                          |                                        |                           |                  |
| NF-1 negative                                        | 0.06 (0.007)      | 0.56 (0.014)              | 0.12 (0.009)               | 0.15 (0.010)             | 0.02 (0.004)                           | 0.06 (0.007)              | 0.03 (0.005)     |
| NF-1 positive                                        | 0.36 (0.033)      | 0.06 (0.016)              | 0.02 (0.008)               | 0.45 (0.034)             | 0.02 (0.009)                           | 0.09 (0.020)              | 0.00 (0.004)     |

**Supplemental table S3: Five-year state-probabilities and corresponding Aalen standard error [SE] for subgroups of patients with PLGG.** State-probabilities (State 1-7) and corresponding Aalen SE for relevant subgroups of patients with PLGG (≥ 40 patients per subgroup) at time point 5 years after diagnosis. State 1: no intervention. State 2: first surgery without prior adjuvant therapy. State 3: two or more surgeries without prior adjuvant therapy. State 4: first adjuvant therapy. State 5: one or more surgeries after first adjuvant therapy. State 6: two or more adjuvant therapies. State 7: death of any cause. Levels of progressiveness: non-progressive (states 1 and 2), low progressive (states 3 and 4), and highly progressive (states 5 and 6) PLGG. ChT: chemotherapy. RT: radiotherapy.

|                      | <b>State 1</b><br>[no intervention] | <b>State 2</b><br>[1st surgery] | <b>State 3</b><br>[≥2nd surgery] | <b>State 4</b><br>[1st ChT/RT] | <b>State 5</b> [surgery<br>after 1 <sup>st</sup> ChT/RT] | <b>State 6</b><br>[≥2nd ChT/RT] | <b>State 7</b><br>[Death] |
|----------------------|-------------------------------------|---------------------------------|----------------------------------|--------------------------------|----------------------------------------------------------|---------------------------------|---------------------------|
| <b>starting from</b> | Probability (SE)                    | Probability (SE)                | Probability (SE)                 | Probability (SE)               | Probability (SE)                                         | Probability (SE)                | Probability (SE)          |
| State 1              | 0.75 (0.030)                        | 0.10 (0.020)                    | 0.00 (0.001)                     | 0.13 (0.021)                   | 0.01 (0.002)                                             | 0.02 (0.004)                    | 0.00 (0.000)              |
| State 2              |                                     | 0.88 (0.012)                    | 0.06 (0.009)                     | 0.05 (0.007)                   | 0.00 (0.001)                                             | 0.01 (0.001)                    | 0.00 (0.002)              |
| State 3              |                                     |                                 | 0.83 (0.031)                     | 0.14 (0.026)                   | 0.01 (0.002)                                             | 0.02 (0.004)                    | 0.01 (0.008)              |
| State 4              |                                     |                                 |                                  | 0.74 (0.025)                   | 0.07 (0.013)                                             | 0.18 (0.021)                    | 0.01 (0.006)              |
| State 5              |                                     |                                 |                                  |                                | 0.55 (0.104)                                             | 0.42 (0.094)                    | 0.04 (0.018)              |
| State 6              |                                     |                                 |                                  |                                |                                                          | 0.84 (0.049)                    | 0.16 (0.049)              |

**Supplemental table S4: Three-year prediction model for disease-state development starting from state 1-6 at 2 years after diagnosis.** Five-year state-probabilities (State 1-7) and corresponding Aalen standard error [SE] for patients with PLGG having had reached state 1-6 at time point 2 years after diagnosis. State 1: no intervention. State 2: first surgery without prior adjuvant therapy. State 3: two or more surgeries without prior adjuvant therapy. State 4: first adjuvant therapy. State 5: one or more surgeries after first adjuvant therapy. State 6: two or more adjuvant therapies. State 7: death of any cause. Levels of progressiveness: non-progressive (states 1 and 2), low progressive (states 3 and 4), and highly progressive (states 5 and 6) PLGG. ChT: chemotherapy. RT: radiotherapy.
